# Supplementary material for: A sensitive and low background fluorescent sensing strategy based on g-C3N4–MnO2 sandwich nanocomposite and liposome amplification for ricin detection
Source: Royal Society of Chemistry journal article supplement (doi:10.1039/c8an01217b), 2018-01-01
Supplement: c8an01217b1.pdf [file c8an01217b1.pdf]

## Supporting Information

### **A Sensitive and Low background Fluorescent Sensing Strategy Based on g-C<sub>3</sub>N<sub>4</sub>-MnO<sub>2</sub> Sandwich Nanocomposite and Liposome Amplification for Ricin Detection**

Chen Men <sup>a</sup>, Chun Hong Li<sup>a</sup>, Xue Mei Wei<sup>a</sup>, Jia Jun Liu,<sup>b</sup> Yu Xin Liu<sup>a</sup>, Cheng Zhi Huang<sup>a, b</sup>,  
Shu Jun Zhen<sup>a,\*</sup>

<sup>a</sup>Key Laboratory of Luminescence and Real-Time Analytical Chemistry (Southwest University),  
Ministry of Education, College of Chemistry and Chemical Engineering, Southwest University,  
Chongqing 400715, P. R. China. E-mail: zsj@swu.edu.cn; Fax: +86 2368367257; Tel: +86 23  
68254059

<sup>b</sup>College of Pharmaceutical Sciences, Southwest University, Chongqing 400715, P. R. China.

## **Table of contents**

Supplementary Discussion

Supplementary Tables

Supplementary Figures

Supplementary References

## Supplementary Discussion

### Calculation of the number of enzyme-encapsulated liposomes

The lipid molecules ( $N_{tot}$ ) number in a GOD-liposome was calculated according to equation (1):

$$N_{tot} = \frac{[4\pi\left(\frac{d}{2}\right)^2 + 4\pi\left[\frac{d}{2} - h\right]^2]}{\alpha_L} \quad (1)$$

Where  $d$  is the hydrodynamic diameter,  $h$  is the bilayer thickness, and  $\alpha_L$  is the average head group surface area per lipid. The lipid bilayer thickness was assumed to be 4 nm and  $\alpha_L$  value for phosphatidylcholine, phosphoethanolamine and cholesterol were  $0.65 \pm 0.01 \text{ nm}^2$ ,  $0.52 \pm 0.01 \text{ nm}^2$ , and  $0.41 \text{ nm}^2$ , respectively. Rely on those values and the molar fraction of each component, the  $\alpha_L$  value obtained for our produced liposomes was  $0.6 \text{ nm}^2/\text{lipid}$ . The  $N_{tot}$  was calculated to be  $2.7 \times 10^5$  lipid molecules per liposome. The number of liposomes per milliliter ( $N_{lipo}$ ) can be derived from the lipid concentration with Avogadro's number as shown in equation (2):

$$N_{lipo} = \frac{M_{lipid} \times N_A}{N_{tot} \times 1000} \quad (2)$$

Where  $M_{lipid}$  is the molar concentration of lipid and  $N_A$  is Avogadro's number. The number of GOD-encapsulated liposome was calculated based on the number of lipid molecules in a liposome and the lipid concentration used to compose the liposome solution. Given that the total concentration of lipid used to compose the liposomes is 13 mM, the number of liposomes  $N_{lipo}$  was calculated to be  $2.9 \times 10^{13}$  liposomes per mL.

During the fabrication process, the liposome solution lost during extrusion and dialysis step was estimated to be around  $10 \pm 3\%$  and  $40.8 \pm 2\%$ , respectively. The data were evaluated preparing similar liposomes with fluorescent phosphatidylcholine lipids and analyzed with UV-vis spectrometry. Thus, liposome recovery number after preparation is calculated to be  $1.2 \times 10^{12}$  liposomes per mL.

The number of glucose oxidase molecules encapsulated in one liposome was calculated according to equation (3):

$$N_{GoD} = \frac{M \times N_A}{M_r \times N_{lipo}} \quad (3)$$

Where  $M$  is enzyme mass, and  $M_r$  is the relative molecular mass according to the aforementioned equation. Therefore, the loading capacity was obtained to be  $1184 \pm 7$  molecules/liposome.

### **Calculation of the encapsulation efficiency in the liposome**

Encapsulation efficiency (EE) was evaluated through three steps. First, a standard calibration curve of free GOD was established (Fig. S3a) and linear absorption equation:  $A=0.9997\ c+0.9993$  was obtained; second, 30  $\mu\text{L}$  of liposomes was broken by  $1\times\text{PBST}$  ( $1\times\text{PBS}$  and 0.05% Tween-20, pH 7.4) and release the encapsulated GOD, which can produce certain absorption ( $A=6.90$ ). According to the linear equation, we can deduce the concentration of GOD as 5.9 mg/mL. Therefore, the total encapsulated GOD mass in liposome is calculated to be 11.8 mg ( $5.9\text{ mg/mL}\times 2\text{ mL}$ ). Third, 59% of encapsulation efficiency was acquired by using total encapsulated GOD mass (11.8 mg) divide the added mass (20 mg).

**The enzyme activity is directly related to the sensitivity of the proposed sensing assay.** The influence of Triton X-100 on GOD activity was investigated. The detailed procedure is: 1% Triton X-100, 0.075 mg/mL GOD, 1.5 mM glucose and 40  $\mu\text{g/mL}$  g- $\text{C}_3\text{N}_4\text{-MnO}_2$  nanocomposite were added together and kept at 55  $^\circ\text{C}$  for 10 minutes. PBS solution was used to replace Triton X-100 as a control. The fluorescence intensity signal is negligible change when adding Triton X-100 (Fig. S3d). It was confirmed that Triton X-100 has no influence on GOD activity.

## Supplementary Tables

**Table S1** Sequences of Oligonucleotides<sup>1, 2</sup>

| Name              | Sequences (5' to 3')                                               |
|-------------------|--------------------------------------------------------------------|
| aptamer           | ACACCCACCGCAGGCAGACGCAACGCCTCGGAGACT<br>TTTTT-biotin               |
| blocker<br>poly-T | CCTGCGGTGGGTGTTTTTTTTTTTTTTTTTTTTTTTTT-cholesterol<br>TTTTT-biotin |

**Table S2** Characterizations of GOD-free liposome and GOD-liposome

| Sample            | mean<br>diameter(nm) <sup>a</sup> | Polydispersity<br>index <sup>a</sup> | Zeta<br>potential(mV) <sup>a</sup> |
|-------------------|-----------------------------------|--------------------------------------|------------------------------------|
| GOD-free Liposome | 142±10.3                          | 0.250±0.020                          | -26.5±0.9                          |
| GOD-liposome      | 165±15.5                          | 0.287±0.032                          | -27.4±1.5                          |

<sup>a</sup>Mean ± standard deviation, n=3; Mean diameter is the hydrodynamic diameter; Polydispersity index indicates the quantification of dispersity; Zeta potential indicates the average surface charge. Mean diameter, polydispersity index and surface charge were obtained by a Malvern Zetasizer instrument.

**Table S3** The fluorescence lifetime of g-C<sub>3</sub>N<sub>4</sub> nanosheet and g-C<sub>3</sub>N<sub>4</sub>-MnO<sub>2</sub> nanocomposite

| Sample                                                          | Fluorescence lifetime (ns) |
|-----------------------------------------------------------------|----------------------------|
| g-C <sub>3</sub> N <sub>4</sub> nanosheet                       | 7.80                       |
| g-C <sub>3</sub> N <sub>4</sub> -MnO <sub>2</sub> nanocomposite | 2.96                       |

**Table S4** Comparison of different methods for RTB detection

| Method                   | LOD (ng/mL) | Assay time | Real sample analysis | Ref       |
|--------------------------|-------------|------------|----------------------|-----------|
| Fluoroimmunoassay        | 1000        | 12 h       | Not given            | 3         |
| Aptamer arrays biosensor | 320         | 6 h        | Not given            | 4         |
| SPR biosensor            | 200         | 20 min     | Not given            | 5         |
| Fluorescence strategy    | 190         | 90 min     | Caster beans         | This work |

## Supplementary Figures

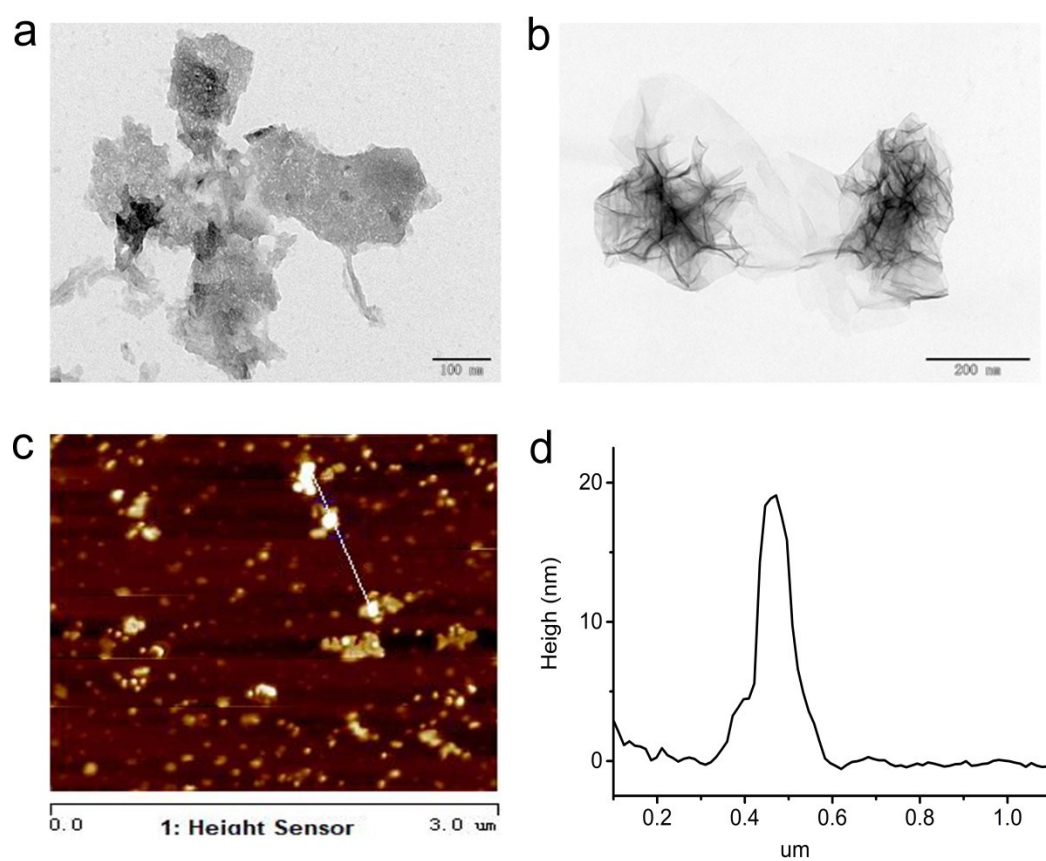

**Fig. S1** TEM picture of g-C<sub>3</sub>N<sub>4</sub> nanosheet (a) and g-C<sub>3</sub>N<sub>4</sub>-MnO<sub>2</sub> nanocomposite (b), AFM image of g-C<sub>3</sub>N<sub>4</sub>-MnO<sub>2</sub> nanocomposite (c & d).

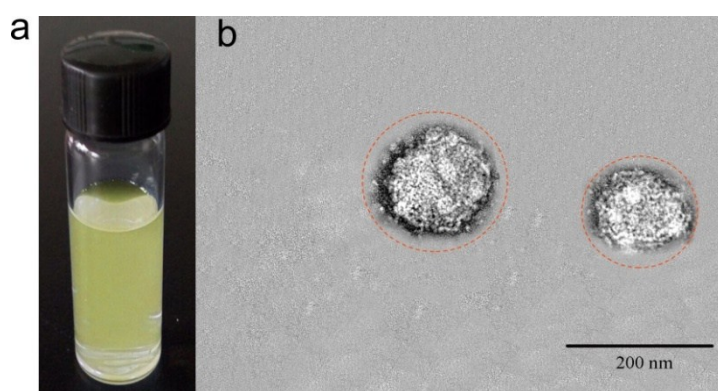

**Fig. S2** The picture (a) and TEM image (b) of the glucose oxidase-encapsulated liposome (GOD-L).

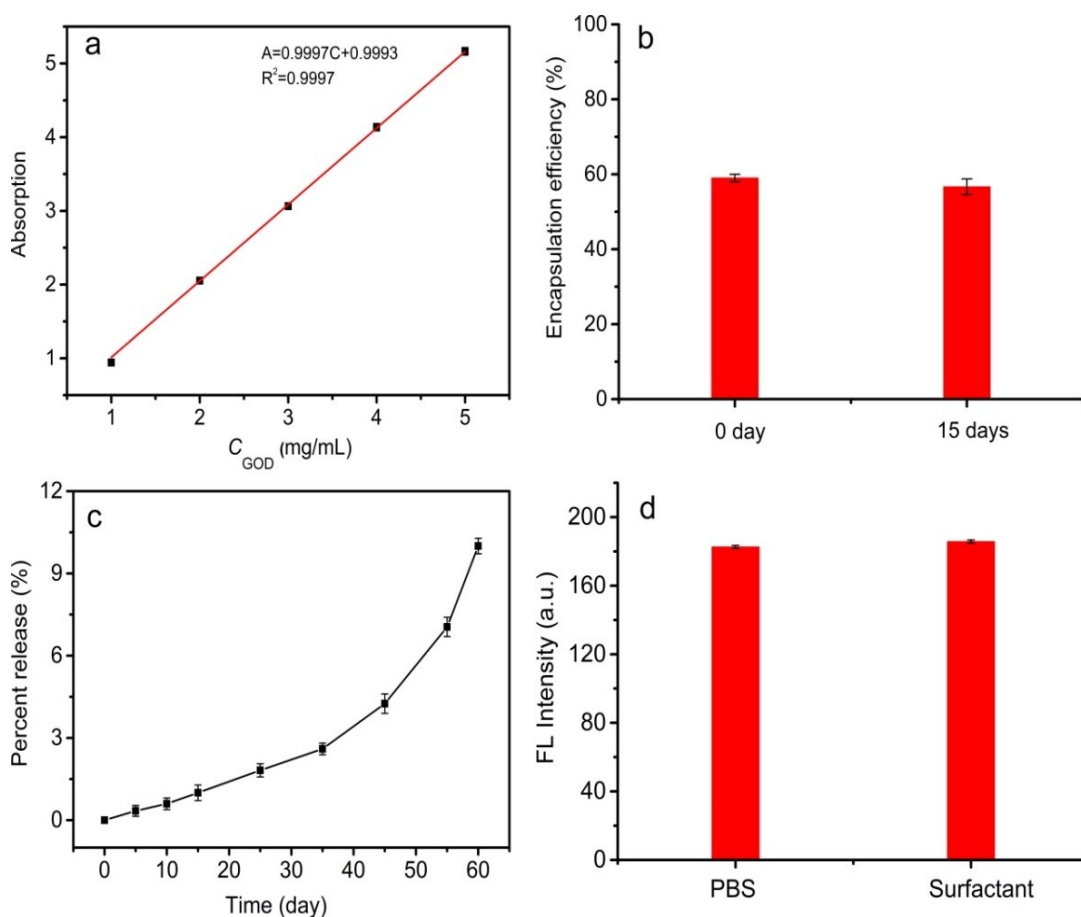

**Fig. S3** (a) UV absorbance of different free GOD concentrations. (b) Encapsulation efficiency of liposomes at 0 day and 15 days. (c) Leakage percent of liposomes at different storage day. (d) Effect of surfactant on enzyme activity.

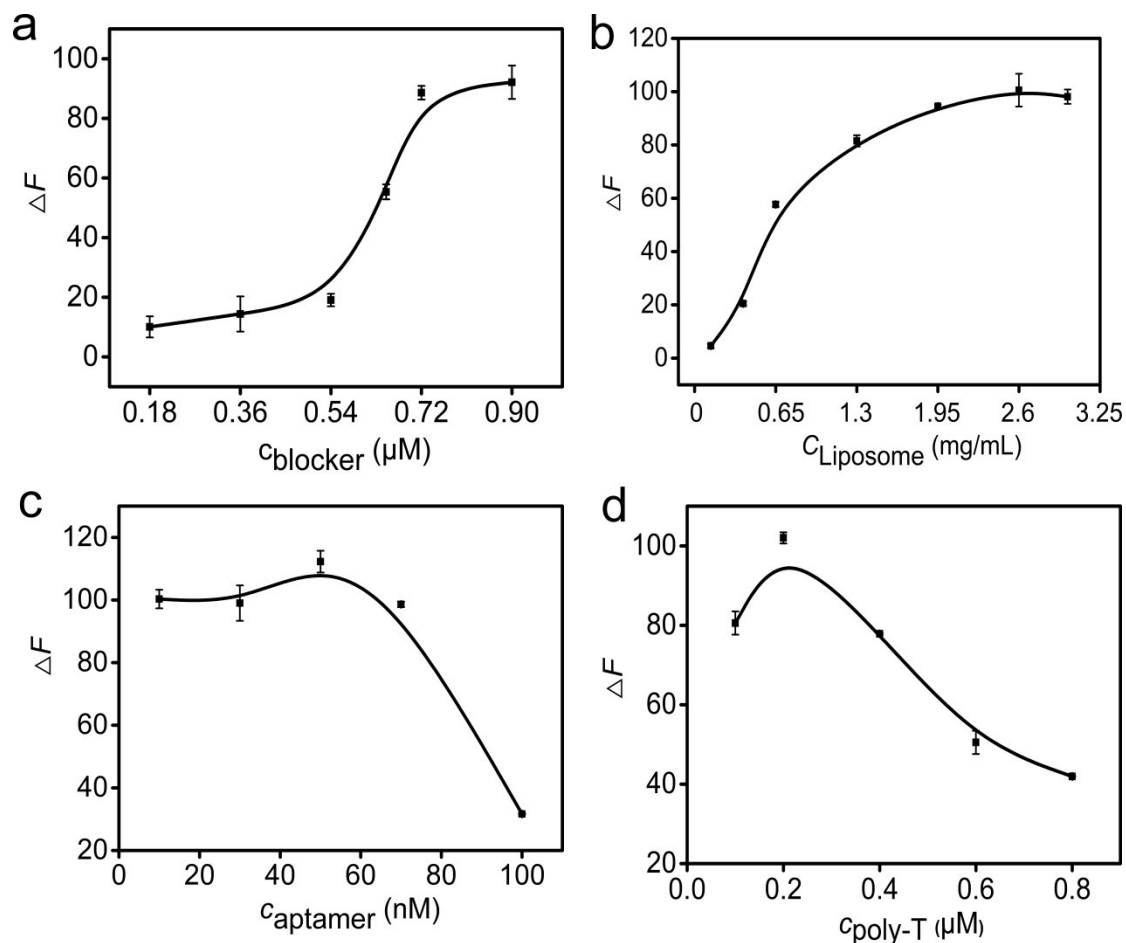

**Fig. S4** Effect of the concentrations of blocker (a), liposome (b), aptamer (c), and poly-T (d) on the detection of RTB. Conditions: a: 2.6  $\text{mg/mL}$  liposome, 50  $\text{nM}$  aptamer, 0.2  $\mu\text{M}$  poly-T; b: 0.72  $\mu\text{M}$  blocker, 50  $\text{nM}$  aptamer, 0.2  $\mu\text{M}$  poly-T; c: 0.72  $\mu\text{M}$  blocker, 2.6  $\text{mg/mL}$  liposome, 0.2  $\mu\text{M}$  poly-T; d: 0.72  $\mu\text{M}$  blocker, 2.6  $\text{mg/mL}$  liposome, 50  $\text{nM}$  aptamer. All of the concentrations of RTB in a-d were 30  $\mu\text{g/mL}$ , 0.5  $\text{mg/mL}$  MBs, 50 min RTB reaction time, 40 min enzyme reaction time. The error bars showed the standard deviation of two replicate determinations.



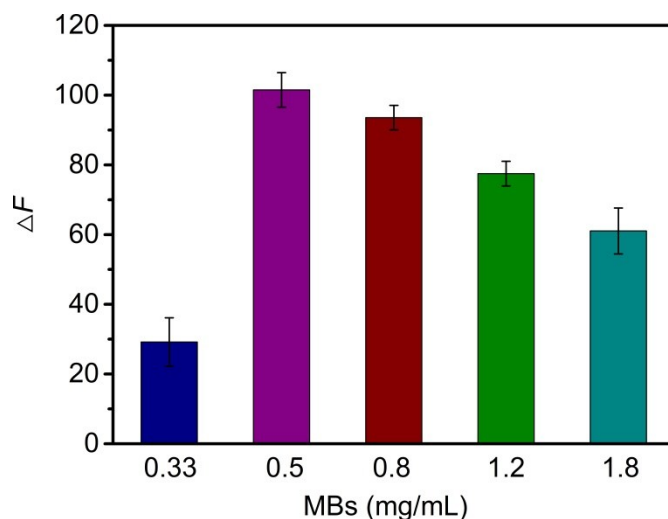

**Fig. S5** Effect of different magnetic beads concentrations on the fluorescence signal. Experimental conditions: 0.72  $\mu\text{M}$  blocker, 2.6 mg/mL liposome, 50 nM aptamer, 0.2  $\mu\text{M}$  poly-T, 50 min RTB reaction time, 40 min enzyme reaction time, the concentration of RTB is 30  $\mu\text{g/mL}$ . The error bars showed the standard deviation of two replicate determinations.

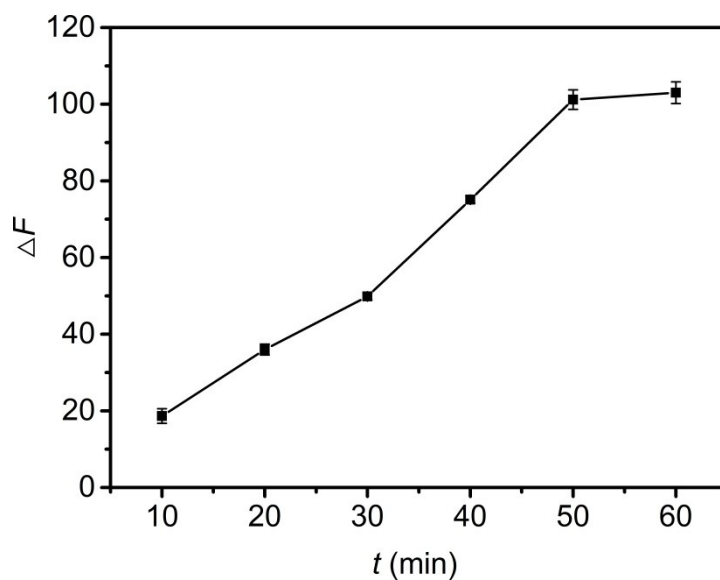

**Fig. S6** Effect of RTB reaction time on the fluorescence signal. Experimental conditions: 0.72  $\mu\text{M}$  blocker, 2.6 mg/mL liposome, 50 nM aptamer, 0.2  $\mu\text{M}$  poly-T, 0.5 mg/mL MBs, 40 min enzyme reaction time, the concentration of RTB is 30

$\mu\text{g/mL}$ . The error bars showed the standard deviation of two replicate determinations.

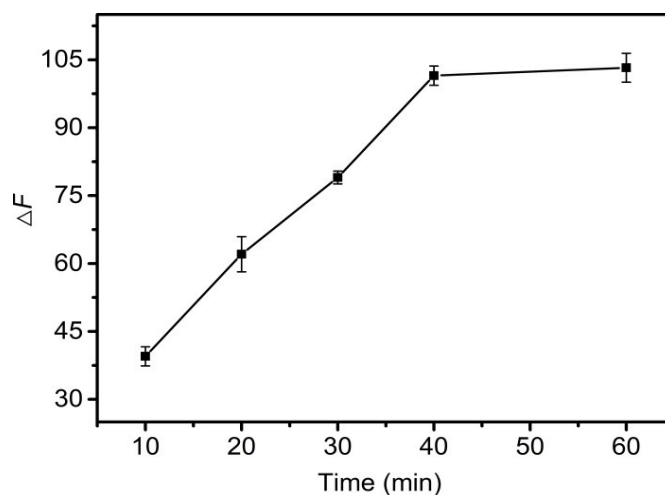

**Fig. S7** Effect of enzyme reaction time on the fluorescence signal. Experimental conditions:  $0.72 \mu\text{M}$  blocker,  $2.6 \text{ mg/mL}$  liposome,  $50 \text{ nM}$  aptamer,  $0.2 \mu\text{M}$  poly-T,  $0.5 \text{ mg/mL}$  MBs,  $50 \text{ min}$  RTB reaction time, the concentration of RTB is  $30 \mu\text{g/mL}$ . The error bars showed the standard deviation of two replicate determinations.

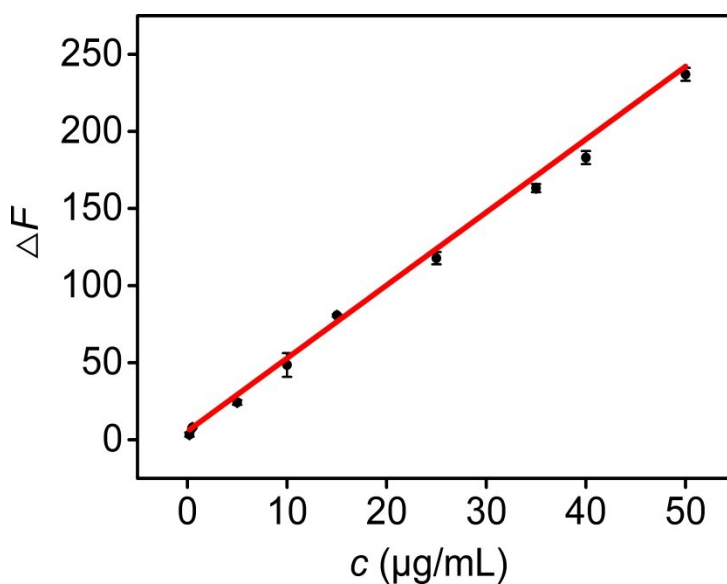

**Fig. S8** Linear relationship between the change in fluorescence intensity ( $\Delta F$ ) and RTB concentration. Experimental conditions: RTB, 1-10, 0, 0.2, 0.5, 5, 10, 15, 25, 35,

40, 50  $\mu\text{g/mL}$ ; 0.72  $\mu\text{M}$  blocker, 2.6  $\text{mg/mL}$  liposome, 50 nM aptamer, 0.2  $\mu\text{M}$  poly-T, 0.5  $\text{mg/mL}$  MBs, 50 min RTB reaction time, 40 min enzyme reaction time. Error bars represent the standard deviations of three independent measurements.

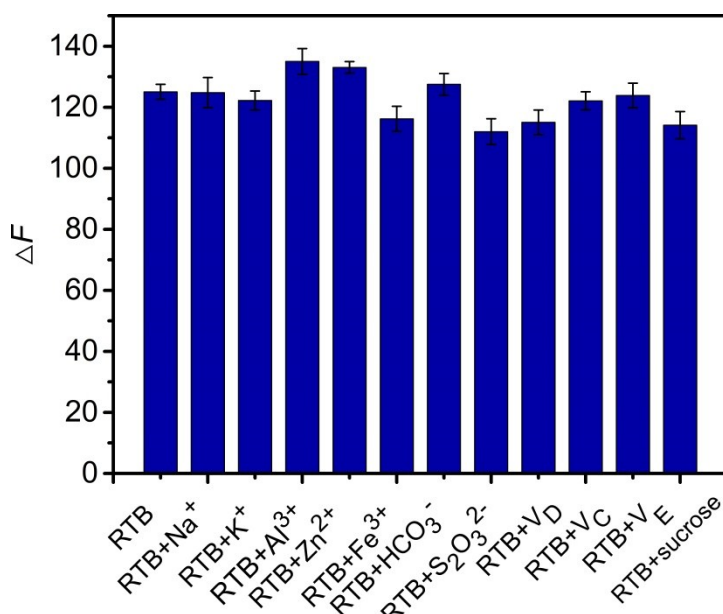

**Fig. S9** The effect of RTB in the presence of various interfering substances. Experimental conditions: RTB, 30  $\mu\text{g/mL}$ ; Na<sup>+</sup>, K<sup>+</sup>, Al<sup>3+</sup>, Zn<sup>2+</sup>, Fe<sup>3+</sup>, HCO<sub>3</sub><sup>-</sup>, S<sub>2</sub>O<sub>3</sub><sup>2-</sup>, V<sub>D</sub>, V<sub>C</sub>, V<sub>E</sub>, sucrose, 300  $\mu\text{g/mL}$ . The error bars showed the standard deviation of two replicate determinations.

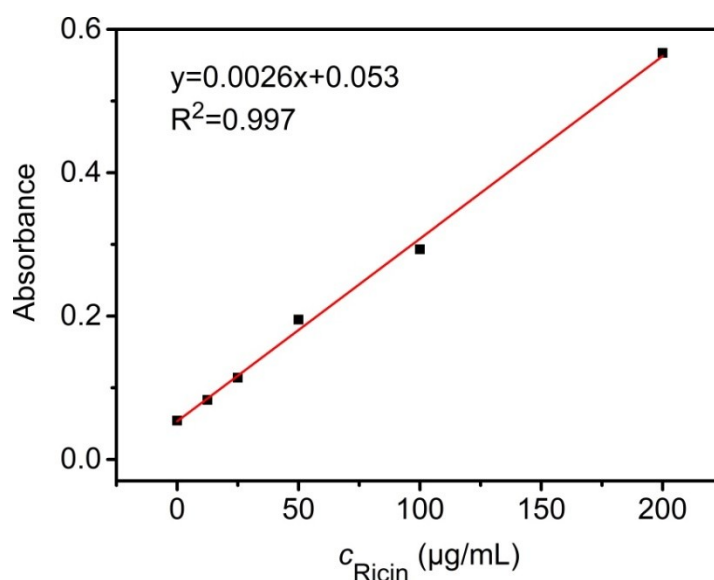

**Fig. S10** The standard curve of ricin detection by ELISA kit. The regression equation was  $y = 0.0026x + 0.053$  ( $R^2 = 0.997$ ), where  $y$  was the absorbance and  $x$  was the concentration of ricin ( $\mu\text{g/mL}$ ). The error bars showed the standard deviation of three replicate determinations.

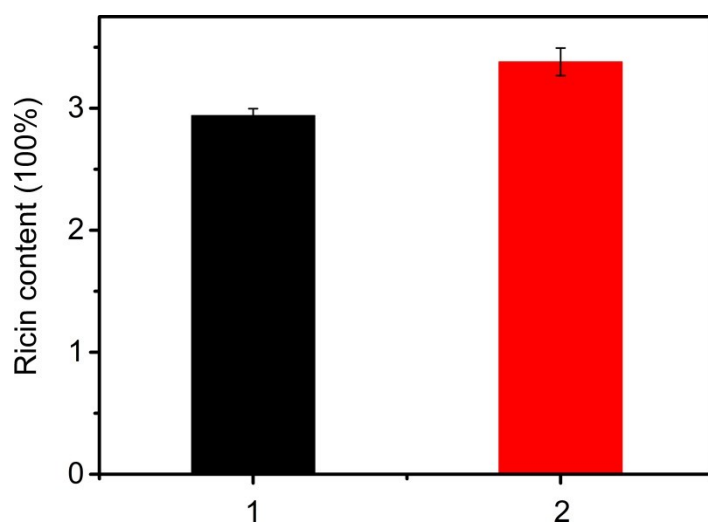

**Fig. S11** The ricin content in castor beans. 1, the ricin content tested by ELISA kit, which was  $2.94 \pm 0.06\%$ ; 2, the ricin content tested by our method, which was  $3.38 \pm 1.11\%$ . The error bars showed the standard deviation of three replicate determinations.

## Supplementary References

- 1 L. Fetter, J. Richards, J. Daniel, L. Roon, T. J. Rowland and A. J. Bonham, *Chem. Commun.*, 2015, **51**, 15137-15140.
- 2 X. Xiao, J. Tao, H. Z. Zhang, C. Z. Huang and S. J. Zhen, *Biosens. Bioelectron.*, 2016, **85**, 822-827.
- 3 G. P. Anderson and N. L. Nerurkar, *J. Immunol. Methods*, 2002, **271**, 17-24.
- 4 R. Kirby, E. J. Cho, B. Gehrke, T. Bayer, Y. S. Park, D. P. Neikirk, J. T. McDevitt and A. D. Ellington, *Anal. Chem.*, 2004, **76**, 4066-4075.
- 5 B. N. Feltis, B. A. Sexton, F. L. Glenn, M. J. Best, M. Wilkins and T. J. Davis, *Biosens. Bioelectron.*, 2008, **23**, 1131-1136.
